# Supplementary material
Source: HighWire-hosted journal article supplement (https://svn.smart01.highwire.org/content/svn-2021-001374)
Supplement: inline-supplementary-material-1 [file inline-supplementary-material-1.pdf]

## Online Supplemental Material

**China Stroke Statistics:** An Update on the 2019 Report From the National Center for Healthcare Quality Management in Neurological Diseases, China National Clinical Research Center for Neurological Diseases, the Chinese Stroke Association, National Center for Chronic and Non-communicable Disease Control and Prevention, Chinese Center for Disease Control and Prevention and Institute for Global Neuroscience and Stroke Collaborations

**eMethods. Data source and definitions.**

**eTable 1.** ICD-10 disease code used for identification of patients with stroke and comorbidities and ICD-9- CM code used for identification of interventions or procedures

**eTable 2.** Specifications of guideline-recommended performance measures

## 1. Supplementary Methods

### 1.1 Data sources

In this Statistical Update, the results of Global Burden of Disease (GBD) 2019 is used for the prevalence and incidence of stroke <sup>1</sup>.

Mortality data from 2003 to 2019 were provided by the National Mortality Surveillance System (NMSS). NMSS provides the total and cause-specific mortality by provinces and facilitates the development of a comprehensive real-time registration and mortality surveillance system. This system covered 24% of the Chinese population in 31 provinces, autonomous regions and municipalities, and has 605 points of surveillance.<sup>2</sup>

China Chronic Disease and Risk Factors Surveillance (CDRFS, 2018) is used to present estimates of the percentage of people with overweight, obesity, prehypertension and hypertension. CDRFS is a nationwide cross-sectional study conducted every 3 years. The study was designed to measure the epidemiology of chronic disease and associated risk factors by selecting a nationally representative sample of the general population. In the 2018 survey, a total of 194 779 participants were enrolled in the survey. The overall response rate was 94.9%. <sup>3</sup>

The Epidemiological Survey of Thyroid disease, Iodine status and Diabetes (TIDE study) is used for the prevalence of diabetes. TIDE study included 75 880 people in 31 provinces between 2015 and 2017. This multistage, stratified sampling study selected a nationally representative sample of people aged 18 and older according to their age and sex composition of each community and the urban-rural ratio using the latest national census data. <sup>4</sup>

The prevalence of atrial fibrillation is obtained from China Atrial Fibrillation Epidemiologic Study (CAFES). CAFES was a representative, cross-sectional, community-based survey of adults between 2014 and 2016. A 2-stage, stratified cluster design was used to obtain a representative sample of adults (aged  $\geq 45$  years)

in the general population, covering 7 geographic regions of China (Northeast, North, Northwest, East, Central, South, and Southwest China). A total of 64 893 people were invited to participate from 39 communities (14 urban and 25 rural), and 47 841 (73.7%) completed the survey; response rates were 66.4% and 79.3% in men and women, and of 80.3% and 69.0% in rural and urban residents, respectively. <sup>5</sup>

## 1.2 Definition of key indicators

### 1.2.1 Overweight and obesity

For adults ( $\geq 18$  years of age), this was determined using Criteria of Weight for Adults (WS/T 428 - 2013).<sup>6</sup> Being overweight was defined as having a body mass index (BMI) between 24.0 and 27.9 kg/m<sup>2</sup>. Obesity was defined as having a BMI of  $\geq 28.0$  kg/m<sup>2</sup>.

We also used the standards recommended by the WHO <sup>7</sup> that overweight is defined as 25.0 kg/m<sup>2</sup>  $\leq$  BMI < 30.0 kg/m<sup>2</sup> and obesity was defined as BMI  $\geq 30.0$  kg/m<sup>2</sup>.

### 1.2.2 Hypertension

The definition of hypertension and control was using Chinese Hypertension Prevention and Control Guidelines (revised in 2018) <sup>8</sup>.

Hypertension of adults ( $\geq 18$  years of age) is defined as systolic blood pressure  $\geq 140$  mm Hg and/or diastolic blood pressure  $\geq 90$  mm Hg, or self-reported antihypertensive medicine use over the past 2 weeks.

Pre-Hypertension was defined as SBP 120 to 139 mm Hg and DBP 80 to 89 mm Hg without antihypertensive medication.

Rate of hypertension awareness refers to the proportion of individuals having known hypertension (diagnosed by qualified medical institutions or doctors) and subsequently confirmed in the survey. Rate of hypertension treatment refers to the

proportion of individuals in the survey taking antihypertensive drugs over the past 2 weeks. Rate of hypertension control refers to the proportion of individuals whose blood pressure was controlled to a level below 140/90 mm Hg after treatment.

### 1.2.3 Diabetes

A self-reported diagnosis that was determined previously by a healthcare professional.

Newly diagnosed diabetes is defined as:

(1) ADA diagnostic criteria: Among participants without self-reported diabetes: fasting plasma glucose  $\geq 126$  mg/dL (7.0 mmol/L), or oral glucose tolerance test: two hour plasma glucose  $\geq 200$  mg/dL (11.1 mmol/L), or HbA1c  $\geq 6.5\%$ .

(2) WHO diagnostic criteria: Among participants without self-reported diabetes: fasting plasma glucose  $\geq 126$  mg/dL (7.0 mmol/L) or oral glucose tolerance test: two hour plasma glucose  $\geq 200$  mg/dL (11.1 mmol/L).

Total diabetes prevalence is calculated as sum of the number of patients with self-reported diabetes and the number of patients with newly diagnosed diabetes.

Pre-diabetes is identified as those who have no diabetes but have an HbA1c level between 5.7% and 6.4%, fasting plasma glucose level between 100 mg/dL (5.6 mmol/L) and 125 mg/dL (6.9 mmol/L), or 2-hour plasma glucose level between 140 mg/dL (7.8 mmol/L) and 199 mg/dL (11.0 mmol/L).

Awareness rate is defined as the proportion of individuals with physician-diagnosed diabetes among all patients with diagnosed or undiagnosed diabetes.

Treatment rate is defined as the proportion of individuals receiving diabetic treatment medications among all patients with diabetes.

Control rate is defined as the proportion of individuals with an HbA1c level of  $< 7.0\%$  among patients with diabetes who are taking diabetic treatment medications.

#### 1.2.4 Atrial fibrillation

Individuals with AF is identified based on a self-reported history of persistent AF or identified based on results of previous ECG or ECG examinations during the survey.<sup>5</sup>

#### Reference

1. Ma Q, Li R, Wang L, et al. Temporal trend and attributable risk factors of stroke burden in China, 1990-2019: an analysis for the Global Burden of Disease Study 2019. *Lancet Public Health* 2021;6:e897-e906.
2. Zhou M, Xue M. *Annual data set on national mortality surveillance 2019*. Beijing: China Science and Technology Press, 2020.
3. Zhang M, Wu J, Zhang X, et al. Prevalence and control of hypertension in adults in China, 2018. *Chin J Epidemiol* 2021;42:1780-1789
4. Li Y, Teng D, Shi X, et al. Prevalence of diabetes recorded in mainland China using 2018 diagnostic criteria from the American Diabetes Association: national cross sectional study. *BMJ* 2020;369:m997.
5. Du X, Guo L, Xia S, et al. Atrial fibrillation prevalence, awareness and management in a nationwide survey of adults in China. *Heart* 2021;107:535-541.
6. The health standard of People's Republic of China. *Criteria of weight for adults (WS/T 428-2013)* 2013:1–2.
7. WHO. *Obesity preventing and managing the global epidemic. Report of a WHO consultation*. Geneva: WHO, 1997.
8. Chinese Hypertension Prevention and Control Guidelines Revision Committee, Hypertension Alliance (China), Chinese Medical Association Cardiovascular Branch, Chinese Medical Doctor Association Hypertension Professional Committee, et al. Chinese Hypertension Prevention and Control Guidelines (revised in 2018). *Chin J Cardiovascul Med* 2019; 24: 24-56.

**eTable 1.** ICD-10 disease code used for identification of patients with stroke and comorbidities and ICD-9- CM code used for identification of interventions or procedures

| <b>Disease</b>                                        | <b>ICD-10</b> |
|-------------------------------------------------------|---------------|
| <b>Stroke</b>                                         |               |
| Ischemic stroke                                       | I63           |
| Intracerebral hemorrhage stroke                       | I61           |
| Subarachnoid hemorrhage stroke                        | I60           |
| <b>Comorbidities</b>                                  |               |
| Hypertension                                          | I10           |
| Diabetes mellitus                                     | E11.900       |
| Hyperlipidemia                                        | E78.500       |
| Atrial fibrillation                                   | G91.900       |
| Coronary atherosclerotic heart disease                | I25.103       |
| Cardiac arrhythmia                                    | I49.900       |
| Hyperuricaemia                                        | E79.001       |
| Sequelae of cerebral infarction                       | I69.300       |
| lacunar cerebral infarction                           | I63.801       |
| Encephalopathy                                        | G31.902       |
| Cerebral hernia                                       | G93.501       |
| Occlusion and stenosis of unspecified cerebral artery | I66.901       |
| Cerebral atherosclerosis                              | I67.200       |
| Pulmonary infection                                   | J98.414       |
| Pneumonia                                             | J18.900       |
| Aspiration pneumonia                                  | J69.001       |
| Hydrothorax                                           | J94.804       |
| Hypokalemia                                           | E87.600       |
| Hypoproteinemia                                       | E77.801       |
| Fatty liver                                           | K76.000       |
| Hyperplasia of prostate                               | N40.x00       |
| <b>Procedures</b>                                     |               |
| Intracranial artery thrombectomy                      | 39.7400x002,  |

|                                                                                                                                                                          |                                                 |
|--------------------------------------------------------------------------------------------------------------------------------------------------------------------------|-------------------------------------------------|
|                                                                                                                                                                          | 39.7401,39.7400                                 |
| Carotid artery stenting CAS                                                                                                                                              | 0.63                                            |
| Vertebral artery balloon angioplasty                                                                                                                                     | 00.6400x009                                     |
| Intracranial artery stenting/Intracranial artery angioplasty                                                                                                             | 0.6500, 0.6200                                  |
| Vertebral artery stenting                                                                                                                                                | 00.6102                                         |
| Middle cerebral artery stenting                                                                                                                                          | 00.6501                                         |
| Evacuation of intracerebral hematoma/evacuation of intracranial hematoma/transtemporal evacuation of intracerebral hematoma                                              | 01.3900x009,<br>01.2408, 01.3904                |
| Burr-hole drainage of ventricle/Burr-hole decompression of skull                                                                                                         | 01.3901,01.2414                                 |
| Stereotactic aspiration of intracranial hematoma/stereotactic puncture and drainage of intracranial hematoma/ hard tunnel puncture and drainage of intracranial hematoma | 01.3905,<br>01.3900x013,<br>01.3900x003         |
| Endoscopic drainage of hematoma                                                                                                                                          | 01.3906                                         |
| Ventriculo-peritoneal shunt/ventrico-extracranial shunt                                                                                                                  | 02.3400x002,<br>02.3900                         |
| Wrapping of intracranial aneurysm/Resection of intracranial vascular Malformation/Clipping of carotid aneurysm                                                           | 39.5101                                         |
| Resection of intracranial aneurysm                                                                                                                                       | 38.6100x002                                     |
| Neuroendoscopic clipping of intracranial aneurysm                                                                                                                        | 39.5100x004                                     |
| Clipping of posterior communicating artery aneurysm                                                                                                                      | 39.5104                                         |
| Clipping of anterior cerebral artery-anterior communicating artery aneurysm                                                                                              | 39.5107                                         |
| Clipping of middle cerebral artery aneurysm                                                                                                                              | 39.5103                                         |
| Clipping of cerebral aneurysm                                                                                                                                            | 39.5100x007                                     |
| Clipping of aneurysm                                                                                                                                                     | 39.5100                                         |
| <b>Interventions</b>                                                                                                                                                     |                                                 |
| Intracranial aneurysm embolization/Intracranial aneurysm coil embolization/Intracranial aneurysm embolization/Middle cerebral aneurysm embolization                      | 39.7203,<br>39.7204,<br>39.7209,<br>39.7200x006 |
| Intracranial artery stenting/Intracranial artery stent-assist coil embolization                                                                                          | 00.6500x008,<br>00.6500, 39.7205                |
| Intracranial and cervical artery occlusion                                                                                                                               | 39.7500, 39.7200                                |
| Carotid aneurysm embolization                                                                                                                                            | 39.7206                                         |
| Carotid aneurysm coil embolization                                                                                                                                       | 39.7207                                         |
| Internal carotid embolization                                                                                                                                            | 39.7200x004                                     |
| Carotid artery stenting CAS                                                                                                                                              | 00.6300                                         |
| Wrapping of intracranial aneurysm                                                                                                                                        | 39.5201                                         |

---

|                                                                             |             |
|-----------------------------------------------------------------------------|-------------|
| Clipping of intracranial vascular malformation                              | 38.8101     |
| Other arteriorrhaphy                                                        | 39.5200     |
| Clipping of anterior cerebral artery aneurysm                               | 39.5102     |
| Resection of intracranial vascular malformation                             | 38.6101     |
| Clipping of carotid aneurysm                                                | 39.5101     |
| Resection of intracranial aneurysm                                          | 38.6100x002 |
| Neuroendoscopic clipping of intracranial aneurysm                           | 39.5100x004 |
| Clipping of posterior communicating artery aneurysm                         | 39.5104     |
| Clipping of anterior cerebral artery-anterior communicating artery aneurysm | 39.5107     |
| Clipping of middle cerebral artery aneurysm                                 | 39.5103     |
| Clipping of cerebral aneurysm                                               | 39.5100x007 |
| Clipping of aneurysm                                                        | 39.5100     |

---

ICD-10, International Classification of Diseases, 10th Revision; ICD-9-CM, International Classification of Diseases, Ninth Revision, Clinical Modification.



**eTable 2.** Specifications of guideline- recommended performance measures

| Performance measure of ischemic stroke care                  | Performance measure definition for eligible patients                                                                                                                                                                       |
|--------------------------------------------------------------|----------------------------------------------------------------------------------------------------------------------------------------------------------------------------------------------------------------------------|
| <b>Acute performance measures</b>                            |                                                                                                                                                                                                                            |
| <b>Performance measures at admission</b>                     |                                                                                                                                                                                                                            |
| IV rt-PA < 4.5 Hours                                         | Intravenous recombinant tissue plasminogen activator (IV rtPA) in patients who arrive within 3.5 hours after initial symptom onset and treated within 4.5 hours                                                            |
| Early antithrombotics                                        | Antithrombotic therapy prescribed within 2 days of hospitalization, including antiplatelet or anticoagulant therapy                                                                                                        |
| DVT prophylaxis                                              | Patients at risk for deep vein thrombosis (DVT) (non-ambulatory) who received DVT prophylaxis by the end of hospital day two, including pneumatic compression, warfarin sodium, heparin sodium, or new oral anticoagulants |
| Dysphagia screening                                          | Dysphagia screening prior to any oral intake                                                                                                                                                                               |
| Rehabilitation assessment                                    | Assessed for stroke rehabilitation services                                                                                                                                                                                |
| <b>Performance measures at discharge</b>                     |                                                                                                                                                                                                                            |
| Antithrombotic medication                                    | Antithrombotic therapy prescribed at discharge                                                                                                                                                                             |
| Anticoagulation for atrial fibrillation                      | Anticoagulation prescribed at discharge for patients with atrial fibrillation or atrial flutter documented during the hospitalization                                                                                      |
| Antihypertensive medicines for patients with hypertension    | Antihypertension medication prescribed at discharge for patients with history of hypertension disease or hypertension disease documented during the hospitalization                                                        |
| Hypoglycemia medication for diabetes mellitus                | Hypoglycemic medication prescribed at discharge for patients with history of diabetes mellitus or diabetes mellitus documented during the hospitalization                                                                  |
| Statin for lowering low-density lipoprotein $\geq 100$ mg/dL | Statin prescribed at discharge if low-density lipoprotein (LDL) $\geq 100$ mg/dL, if patient treated with lipid lowering agent prior to admission, or LDL not documented Hypoglycemia medication for diabetes mellitus     |

## Smoking cessation

## Smoking cessation intervention (counseling or medication) prior to discharge for current or recent smokers

---

\*Eligible patients are those without any medical contraindications (eg, treatment intolerance, excessive risk of adverse reaction, patient/ family refusal, or terminal illness/comfort care only) documented as reasons for non-treatment for each of the applicable measures. Acute performance measures, except for the rtPA measure, exclude patients who died before the end of day 2 of the hospital stay. Performance measures at discharge exclude patients who died during hospitalisation. AF, atrial fibrillation; DVT, deep vein thrombosis; IS, ischaemic stroke; LDL, low-density lipoprotein; rtPA, recombinant tissue plasminogen activator.
